# Supplementary material for: Facilities are substantially more influential than care providers in the quality of delivery care received: a variance decomposition and clustering analysis in Kenya, Malawi and India
Source: PubMed Central journal article supplement — BMJ Glob Health. 2020 Aug 19;5(8):e002437. doi: 10.1136/bmjgh-2020-002437 (PMC7440830; doi:10.1136/bmjgh-2020-002437), 2020-08-19
Supplement: bmjgh-2020-002437supp001.pdf [file bmjgh-2020-002437supp001.pdf]

**SUPPLEMENTARY INFORMATION**

| <b>Item</b>                                                               | <b>Category</b>    |
|---------------------------------------------------------------------------|--------------------|
| <i>Initial Client Assessment</i>                                          |                    |
| Respectfully greets the pregnant woman                                    | Respectful Care    |
| Encourages the woman to have a support person present                     | Respectful Care    |
| Asks woman if she has any questions                                       | Respectful Care    |
| Check client card or assesses for age, length of pregnancy, and parity    | Technical Practice |
| Asks about at least one danger sign                                       | Technical Practice |
| Washes hands/uses disinfectant before initial examination                 | Technical Practice |
| Explains procedure to woman/support person                                | Respectful Care    |
| Takes temperature                                                         | Technical Practice |
| Takes pulse                                                               | Technical Practice |
| Takes blood pressure                                                      | Technical Practice |
| Checks fetal heart rate                                                   | Technical Practice |
| Checks fundal height & presentation                                       | Technical Practice |
| Asks/notes amount of urine output                                         | Technical Practice |
| Tests urine for presence of protein                                       | Technical Practice |
| Performs vaginal exam                                                     | Technical Practice |
| Informs pregnant woman of findings                                        | Respectful Care    |
| <i>Labor</i>                                                              |                    |
| Initiated use of partograph                                               | Technical Practice |
| Initiated partograph at appropriate time                                  | Technical Practice |
| Drapes woman                                                              | Respectful Care    |
| Encourages foods/fluids during labour                                     | Respectful Care    |
| Encourages/assists the woman to ambulate and assume different positions   | Respectful Care    |
| Washes hands before examination                                           | Technical Practice |
| Wears gloves                                                              | Technical Practice |
| Wears clean protective clothing                                           | Technical Practice |
| Explains procedures to woman/support person                               | Respectful Care    |
| Prepares uterotonic drug to use for AMTSL                                 | Technical Practice |
| <i>Delivery</i>                                                           |                    |
| As baby's head is delivered, supports perineum                            | Technical Practice |
| Checks for another baby prior to administering the uterotonic             | Technical Practice |
| Gives uterotonic                                                          | Technical Practice |
| Applies traction to the cord while applying supra-pubic counter-traction  | Technical Practice |
| Performs uterine massage immediately following placenta delivery          | Technical Practice |
| Assesses integrity of the placenta and membranes                          | Technical Practice |
| Assesses for perineal and vaginal lacerations                             | Technical Practice |
| <i>Immediate newborn care</i>                                             |                    |
| Dries baby with towel, discards wet towel, and covers baby with dry towel | Technical Practice |
| Ties or clamps cord 2-3 minutes after birth                               | Technical Practice |
| Takes vital signs 15 minutes after birth                                  | Technical Practice |
| Palpates uterus 15 minutes after delivery of placenta                     | Technical Practice |
| Breastfeeding initiated within the first hour after birth                 | Technical Practice |
| Applies eye ointment                                                      | Technical Practice |

|                                                                            |                    |
|----------------------------------------------------------------------------|--------------------|
| Administers Vitamin K                                                      | Technical Practice |
| <i>Infection prevention after birth</i>                                    |                    |
| Disposes of all sharps in a puncture-proof container immediately after use | Technical Practice |
| Decontaminates reusable instruments                                        | Technical Practice |
| Disposes of contaminated waste in leak-proof containers                    | Technical Practice |
| Removes apron and wipes with chlorine solution                             | Technical Practice |
| Washes hands with soap & water or uses antiseptic                          | Technical Practice |
| <i>Overall</i>                                                             |                    |
| No harmful or inappropriate practices observed                             | Technical Practice |

Supplementary Table 1. List of items included in Quality of Care Index.
